# Supplementary figures and images for: Radiation-induced unrepairable DSBs: their role in the late effects of radiation and possible applications to biodosimetry
Source: PubMed Central journal article supplement — J Radiat Res. 2017 Dec 21;59(Suppl 2):ii114–20. doi: 10.1093/jrr/rrx074 (PMC5941153; doi:10.1093/jrr/rrx074), 2017-12-21

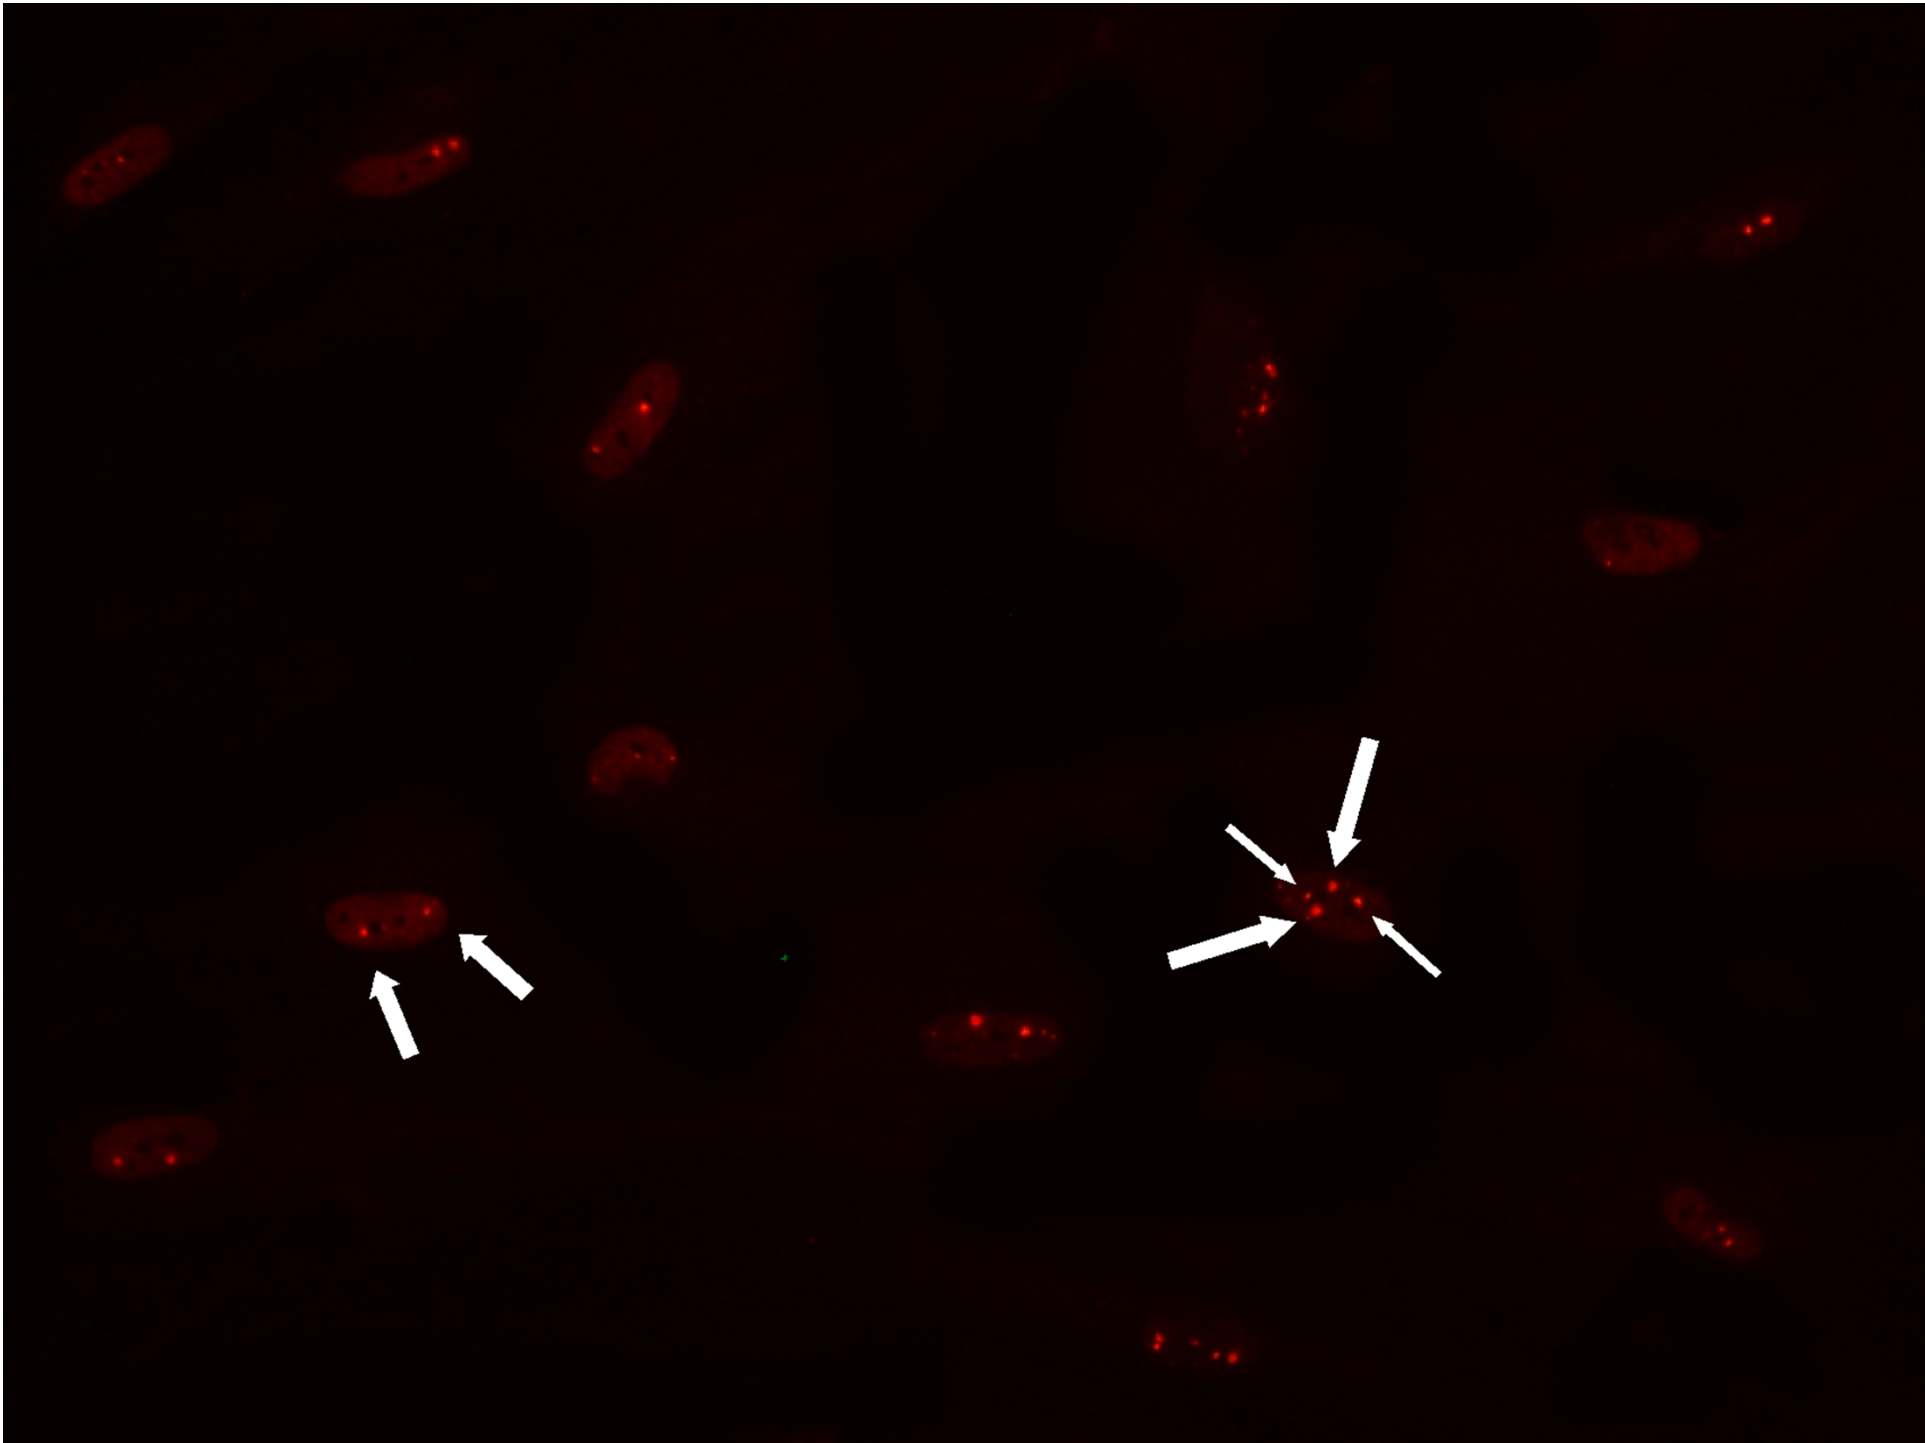

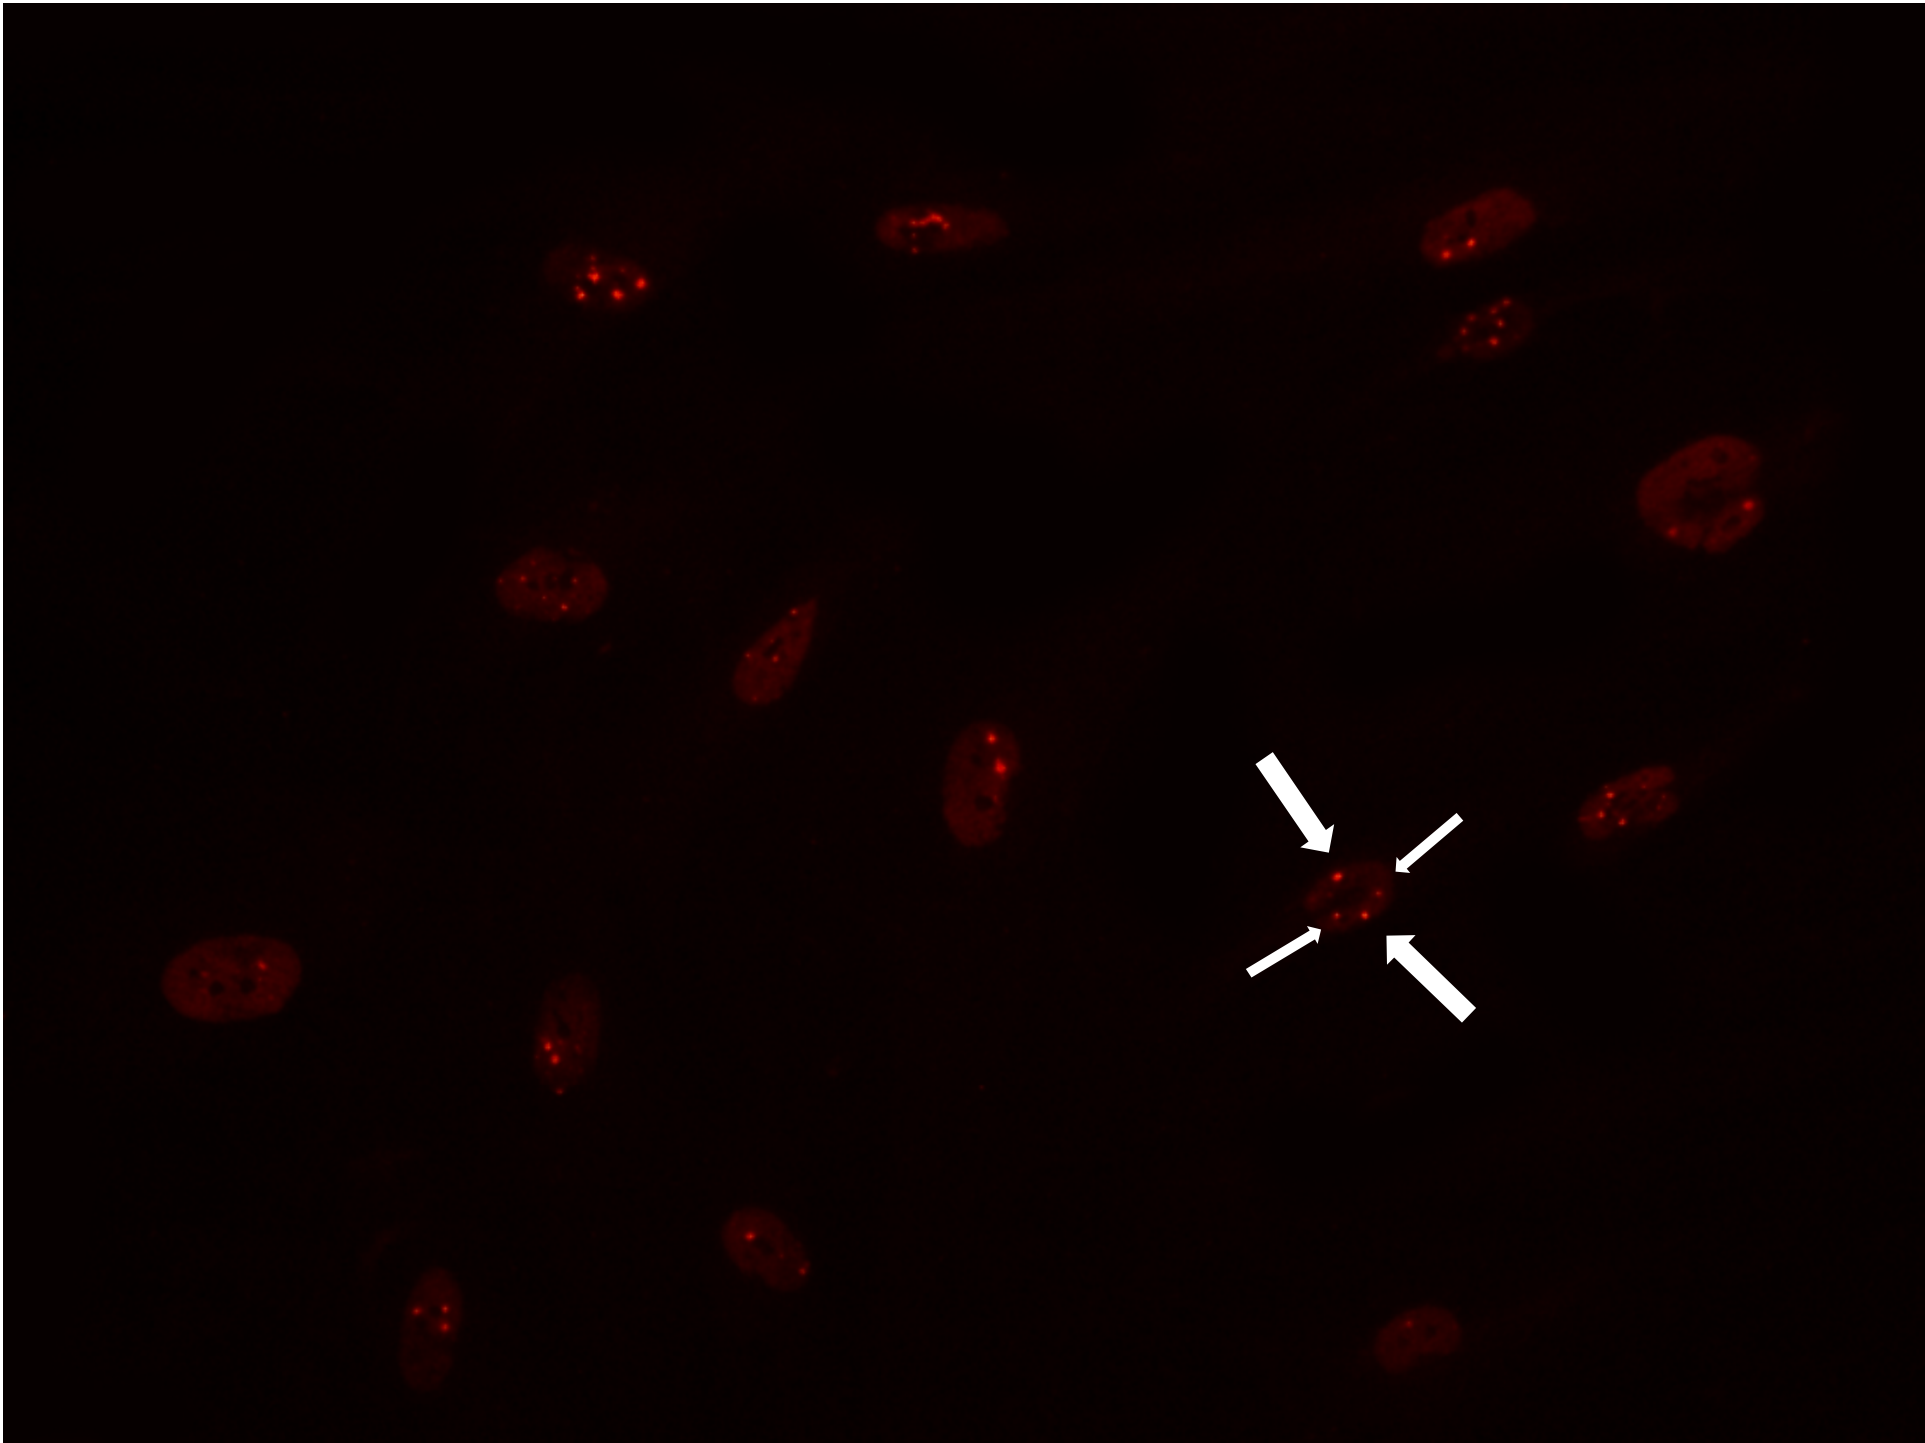

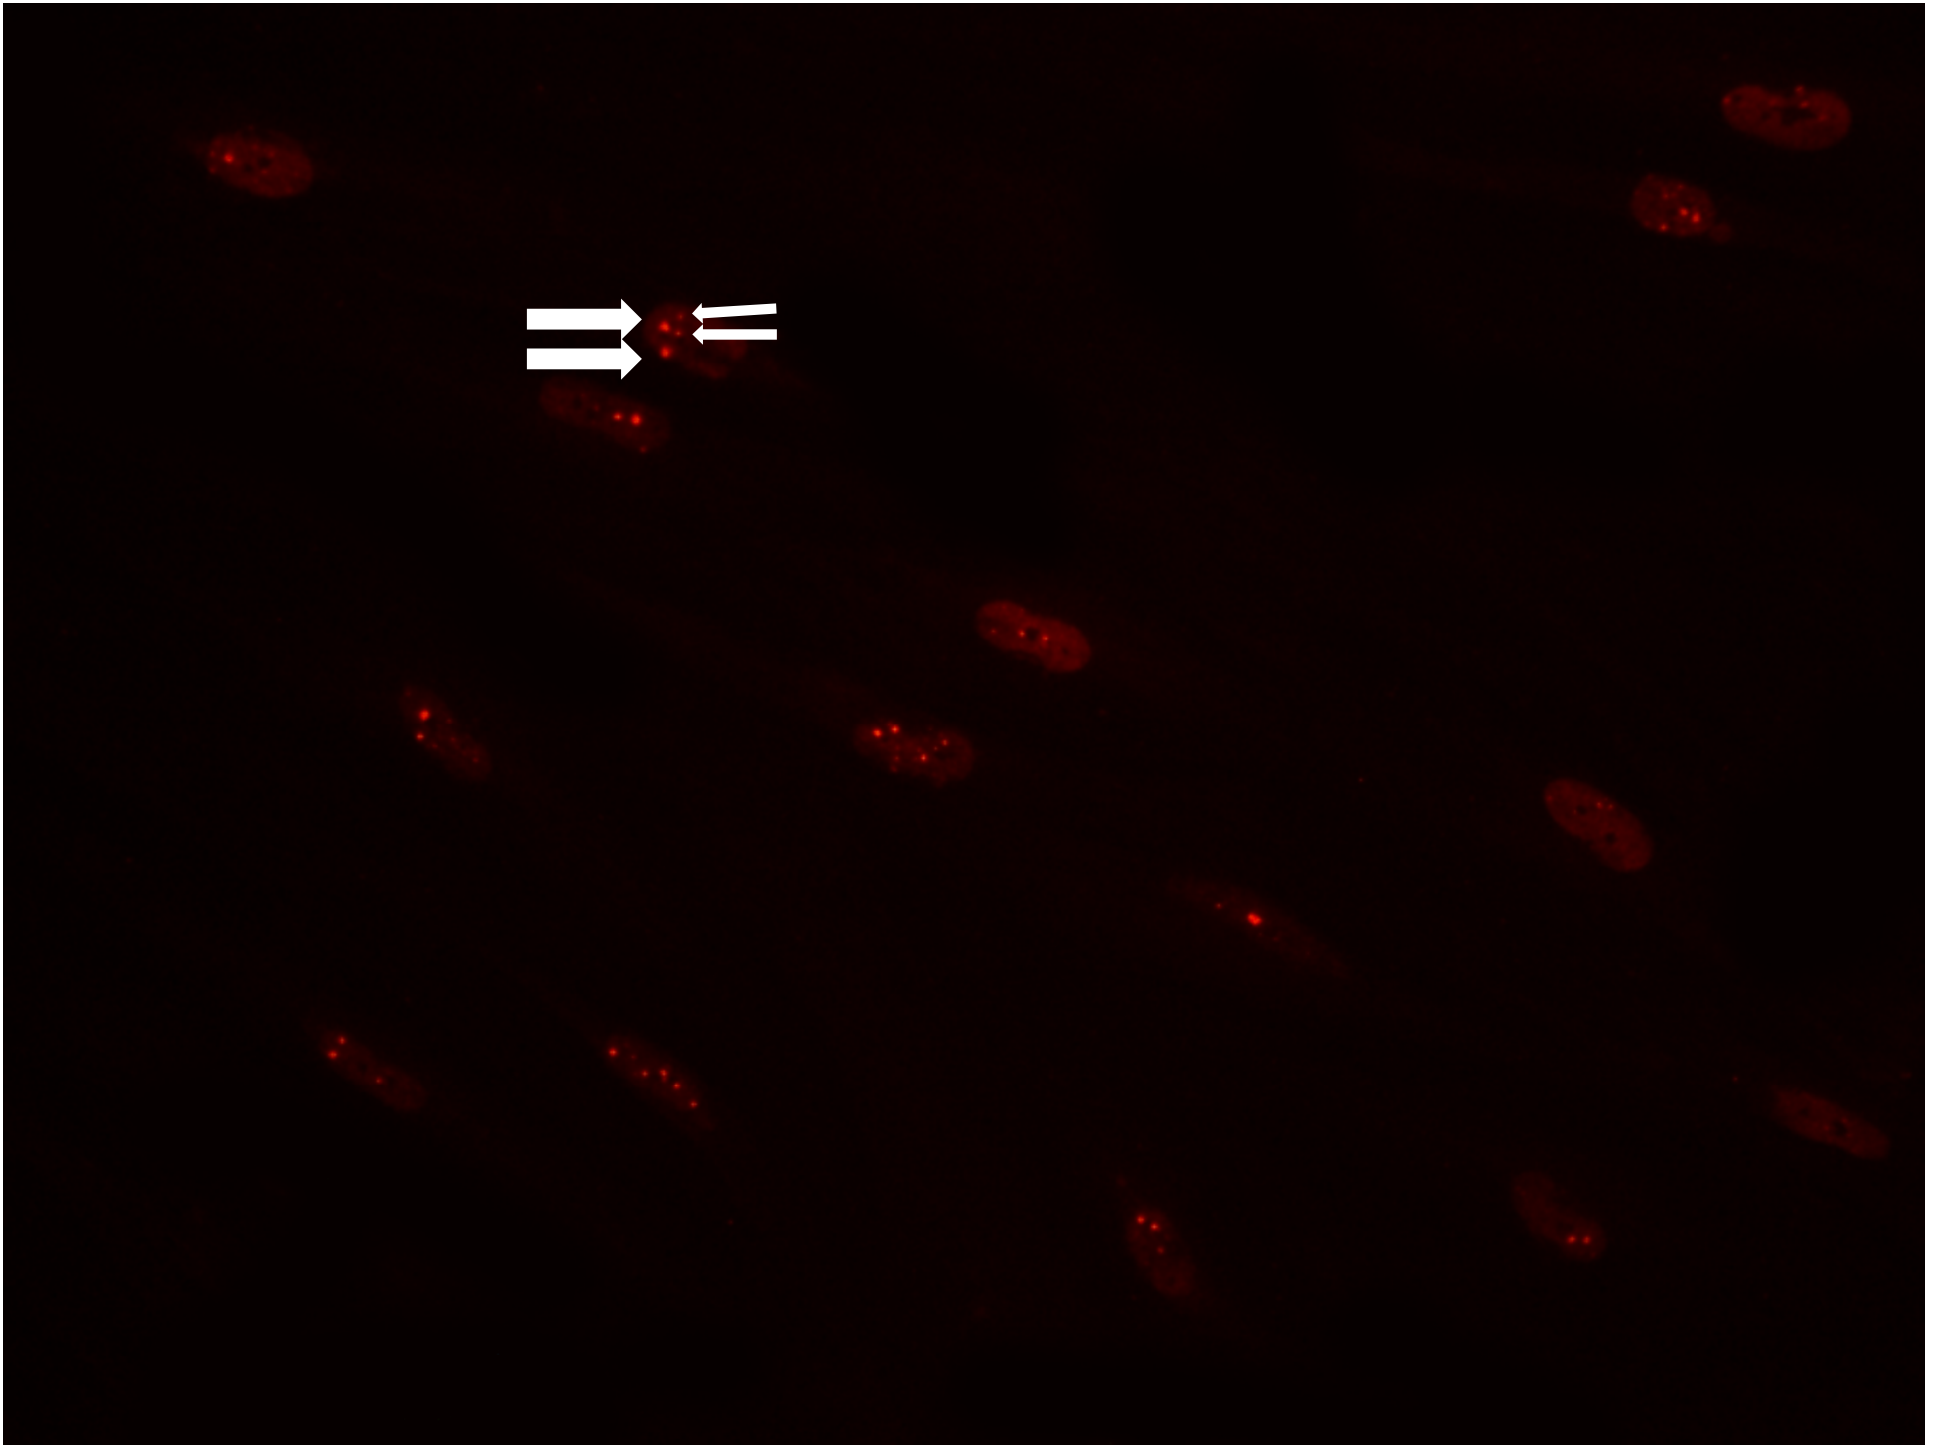

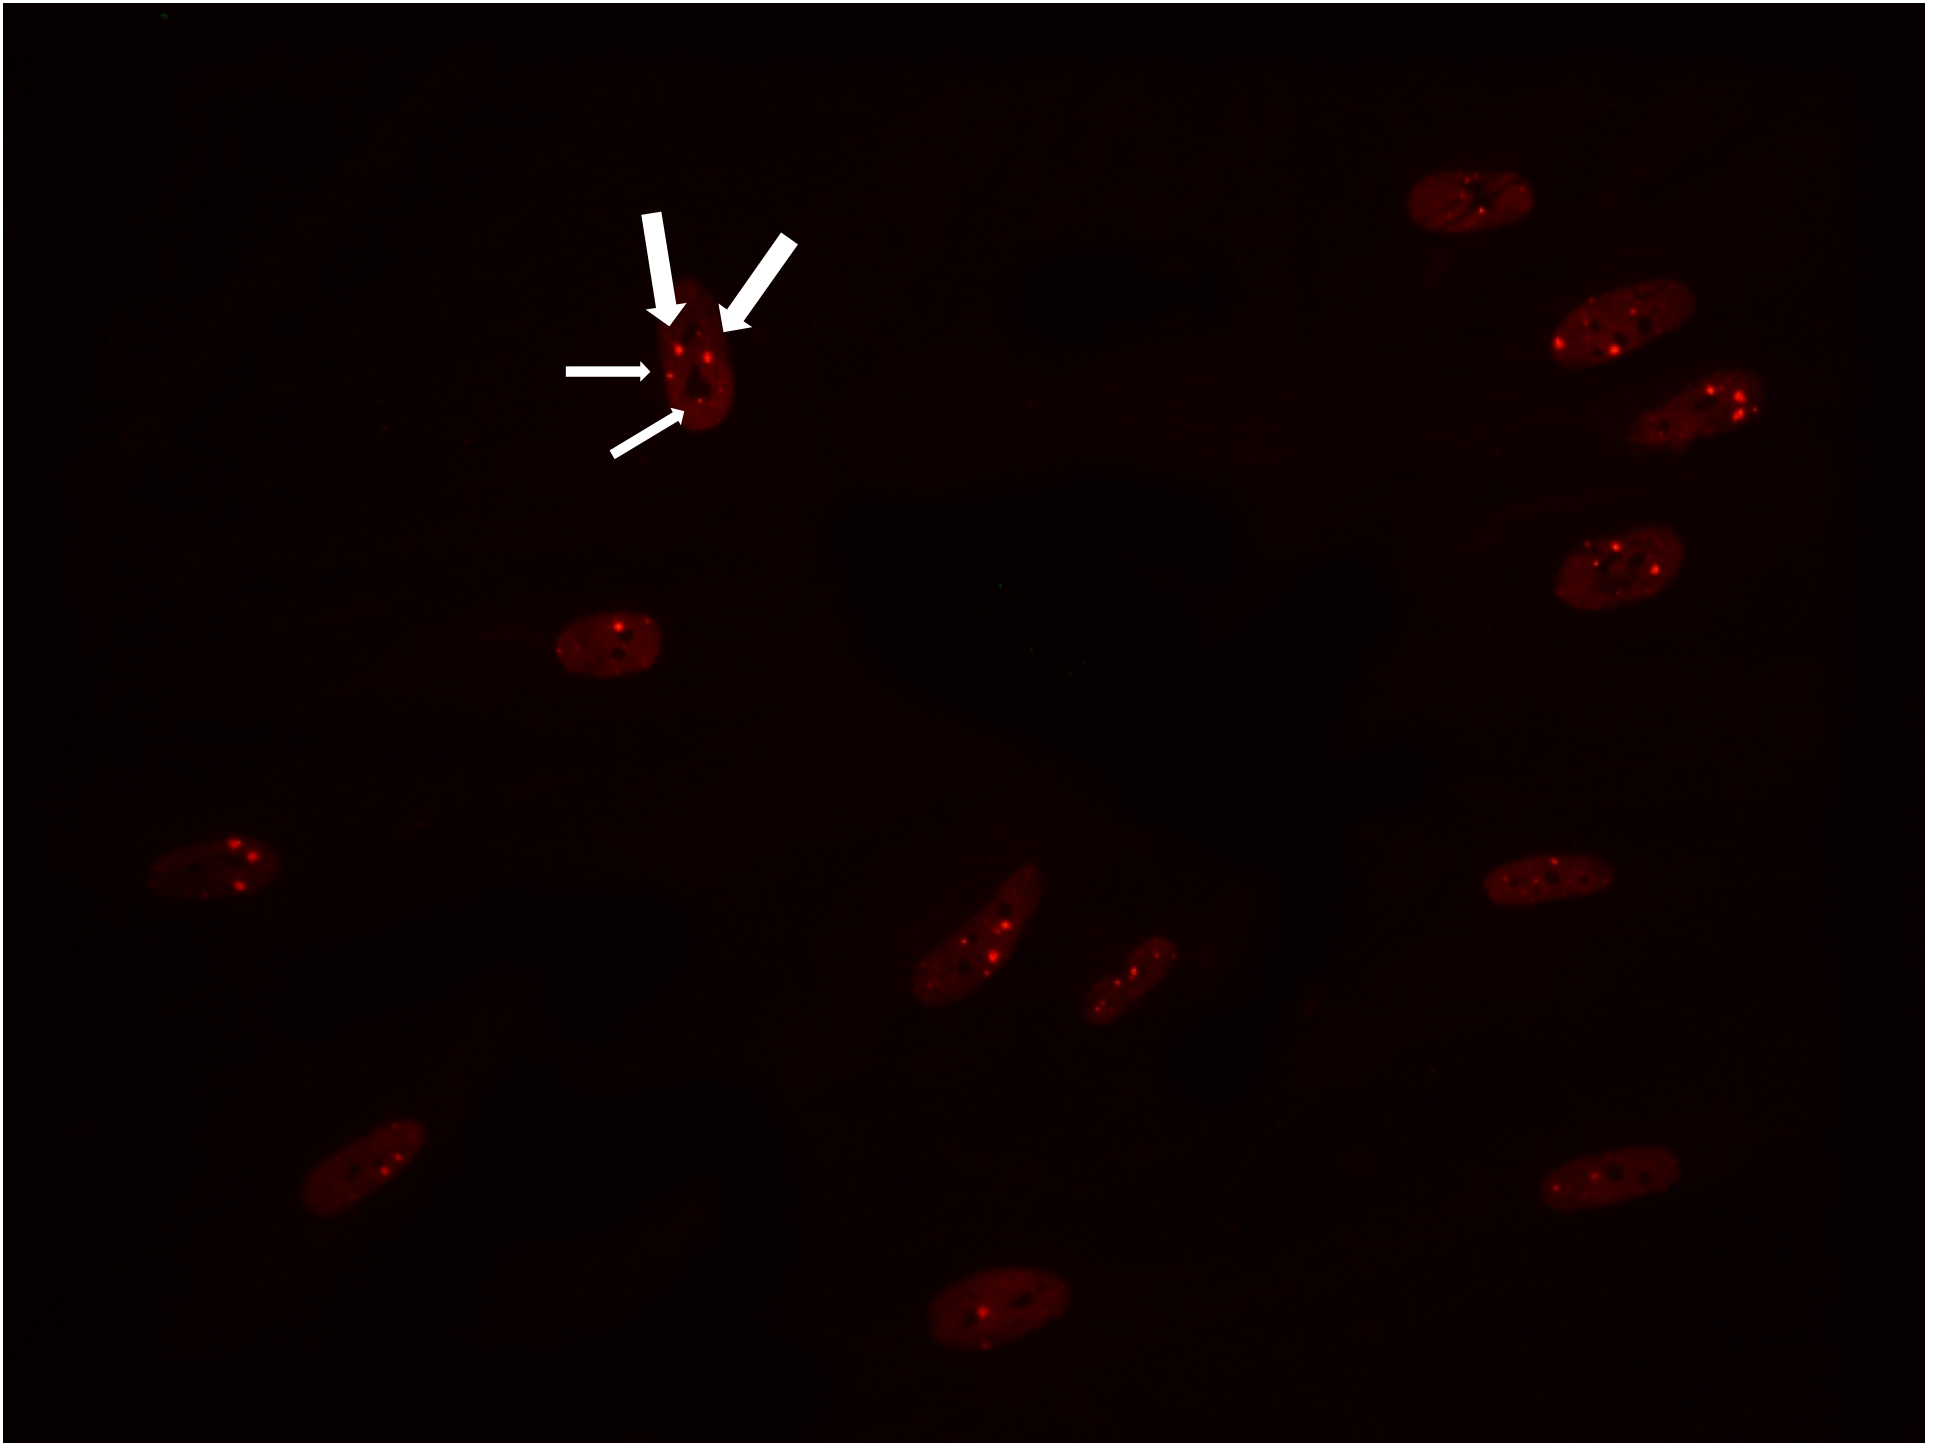

Supplement: rrx074foci_pairs_slide1-4.pdf [file rrx074foci_pairs_slide1-4.pdf]
